# Supplementary figures and images for: Multiplexable fluorescence lifetime imaging (FLIM) probes for Abl and Src-family kinases
Source: Royal Society of Chemistry journal article supplement (doi:10.1039/d0cc05030j), 2020-01-01

SFAS DL488 -EGF

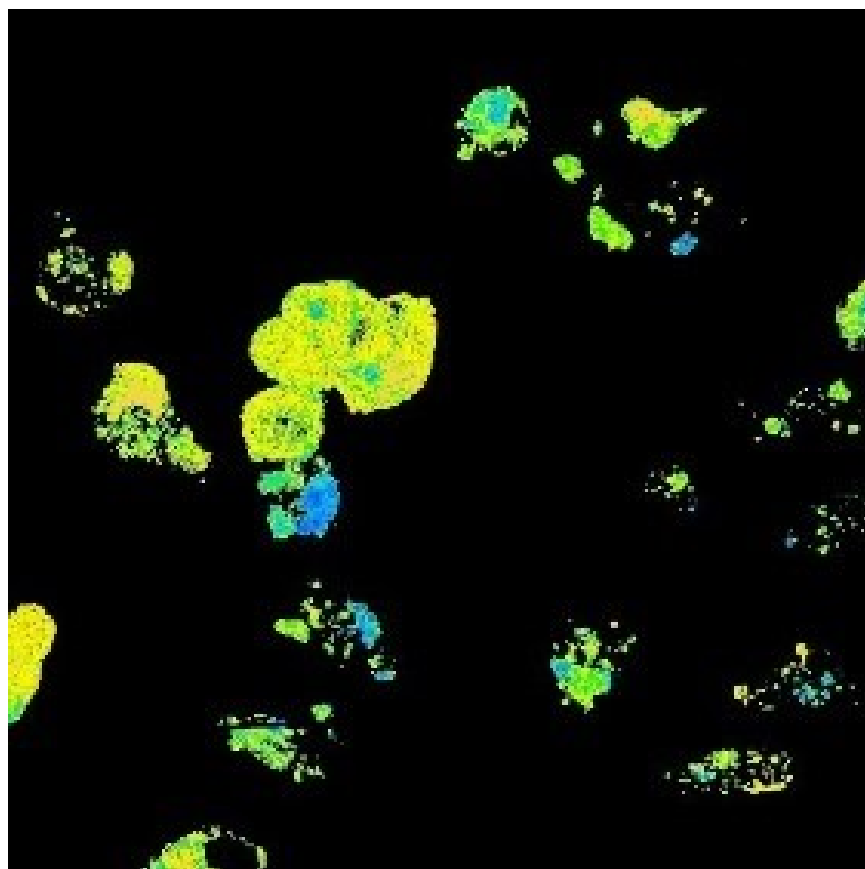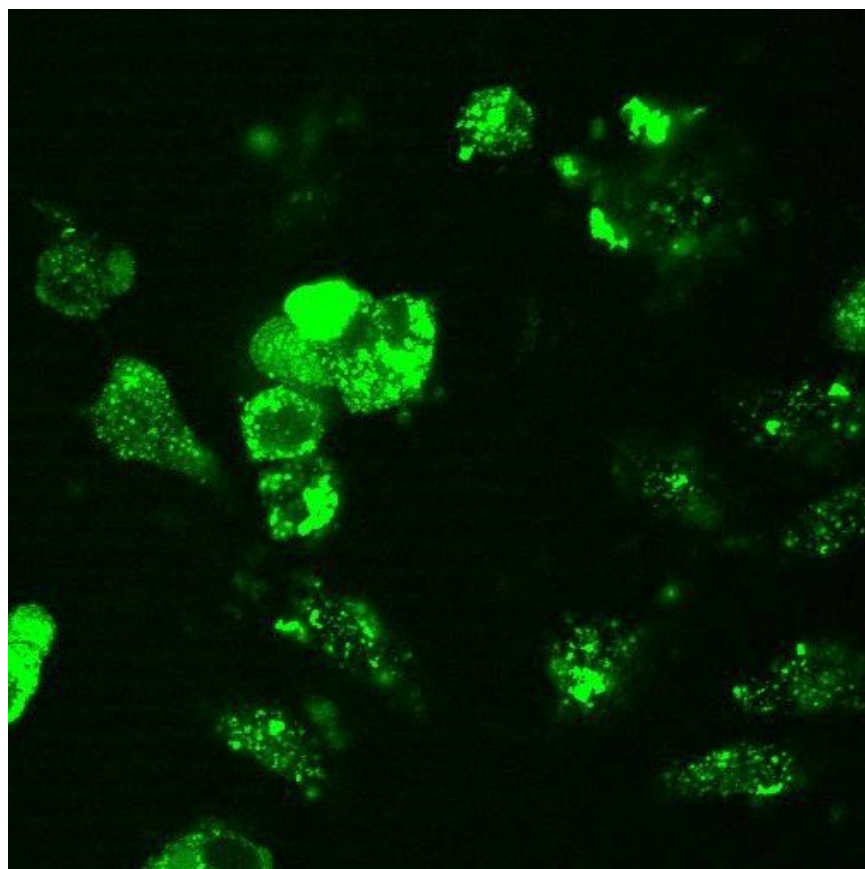

SFAS DL488 +EGF

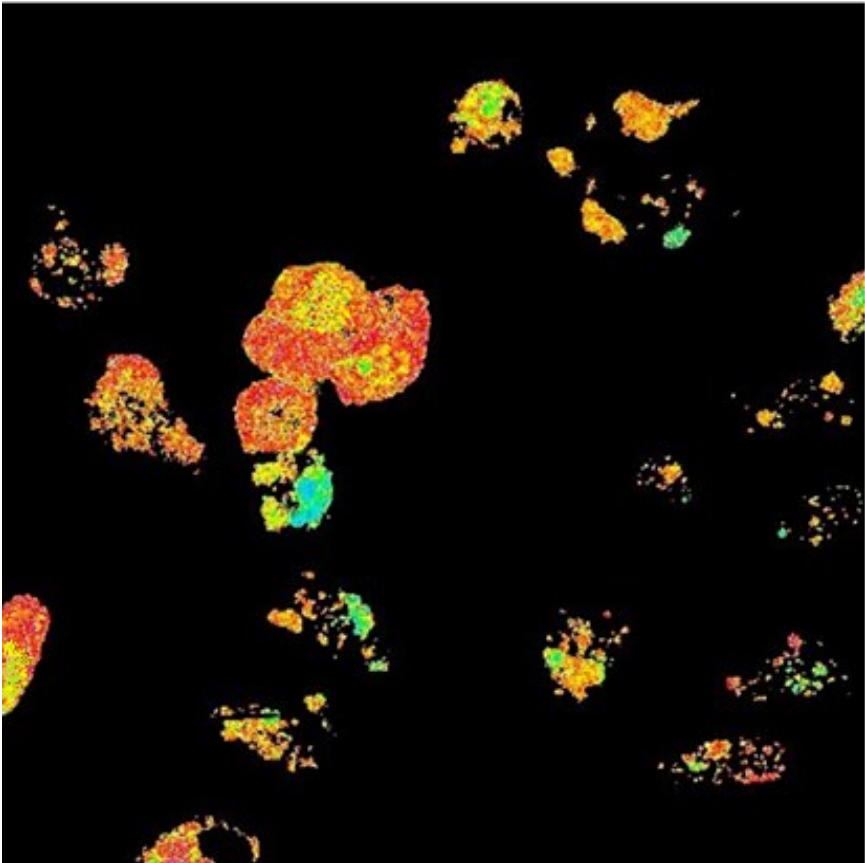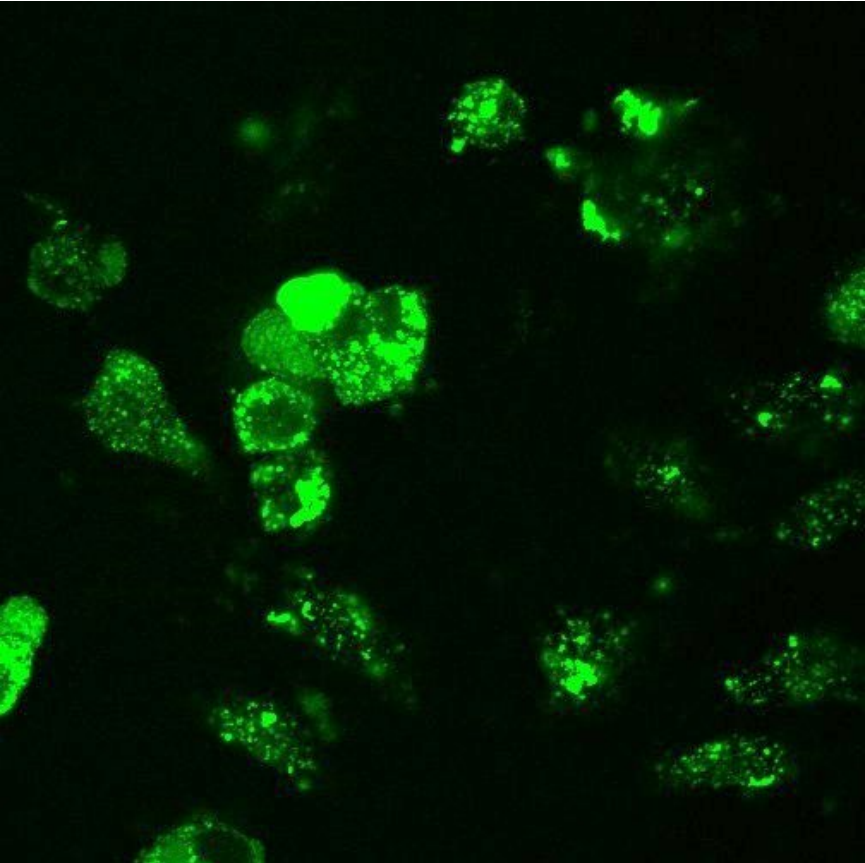

SFAS DL488 +EGF +dasatinib

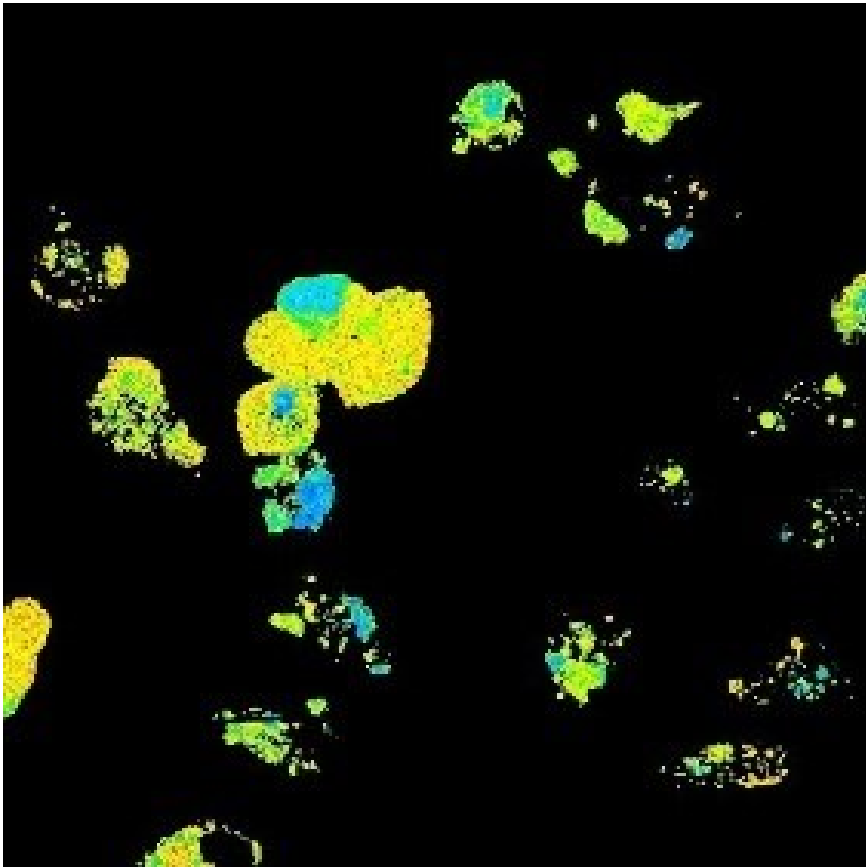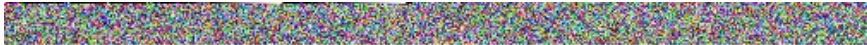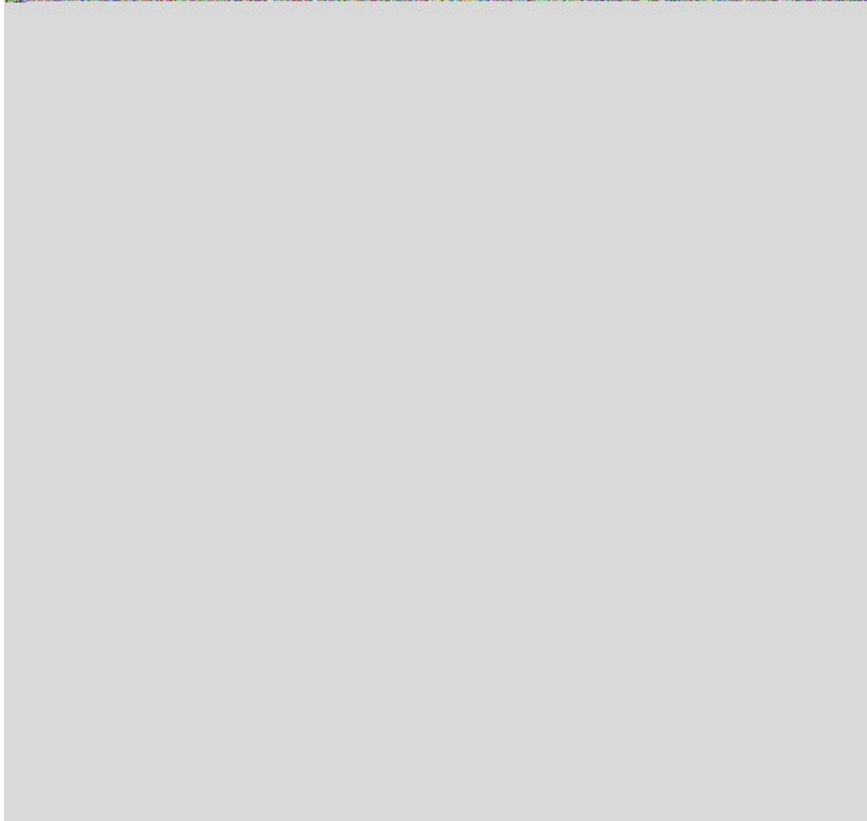

ABL DL550 -EGF

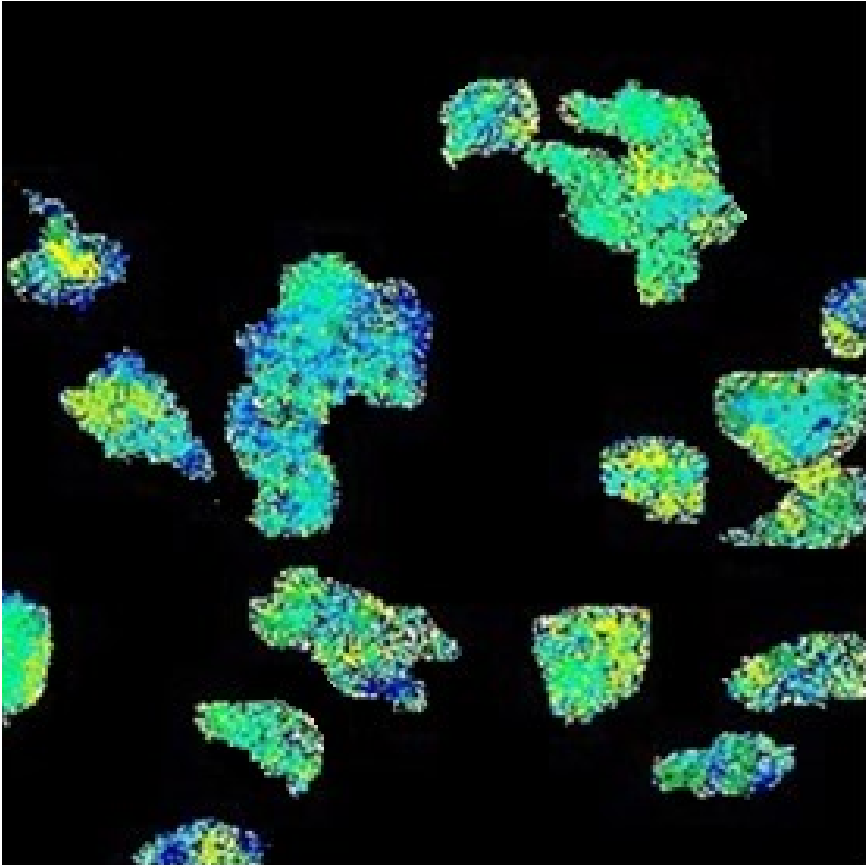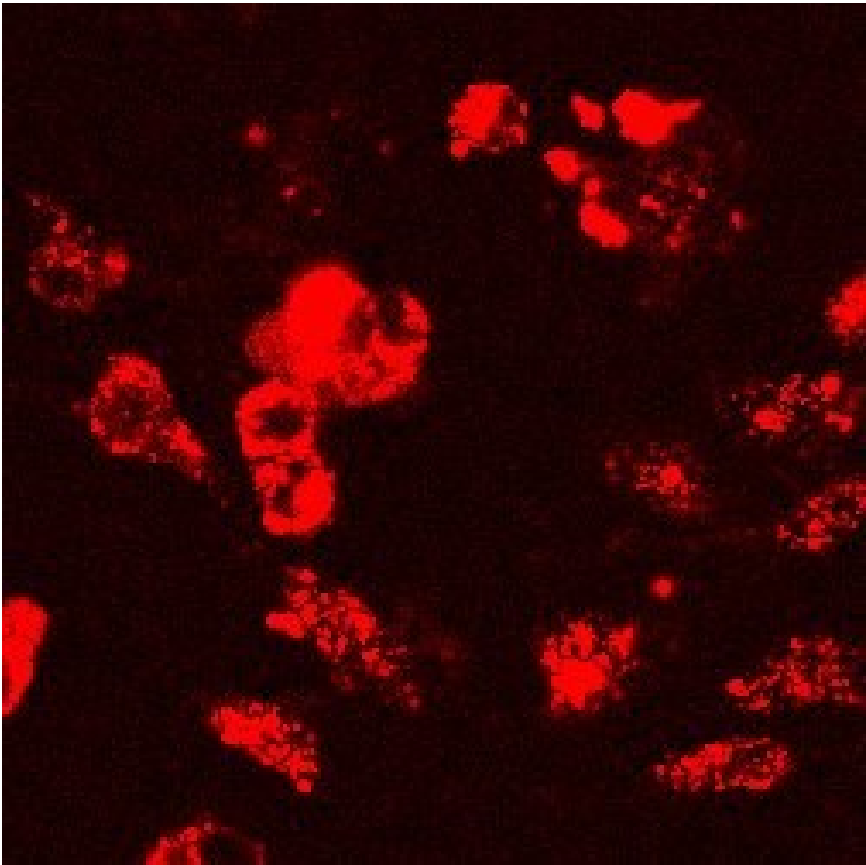

ABL DL550 +EGF

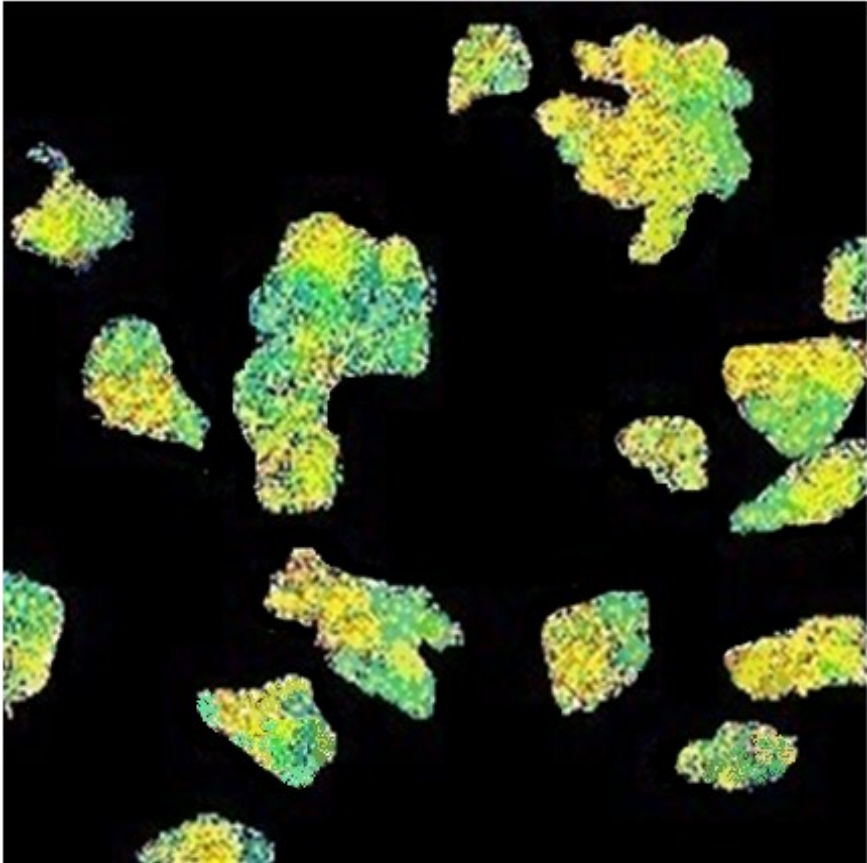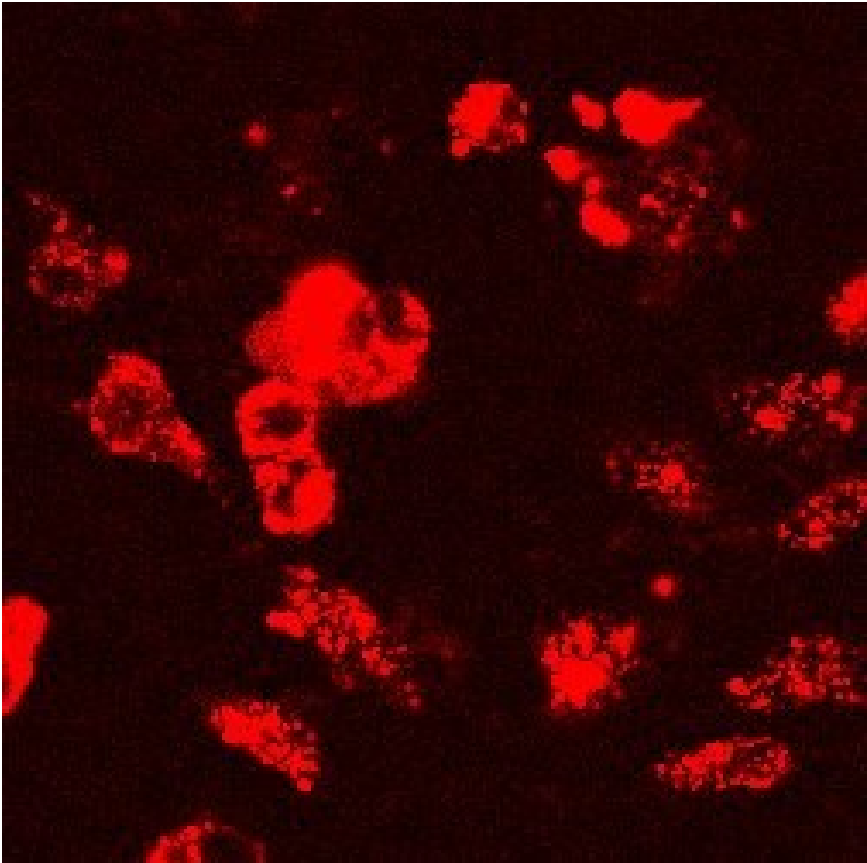

ABL DL550 +EGF +dasatinib

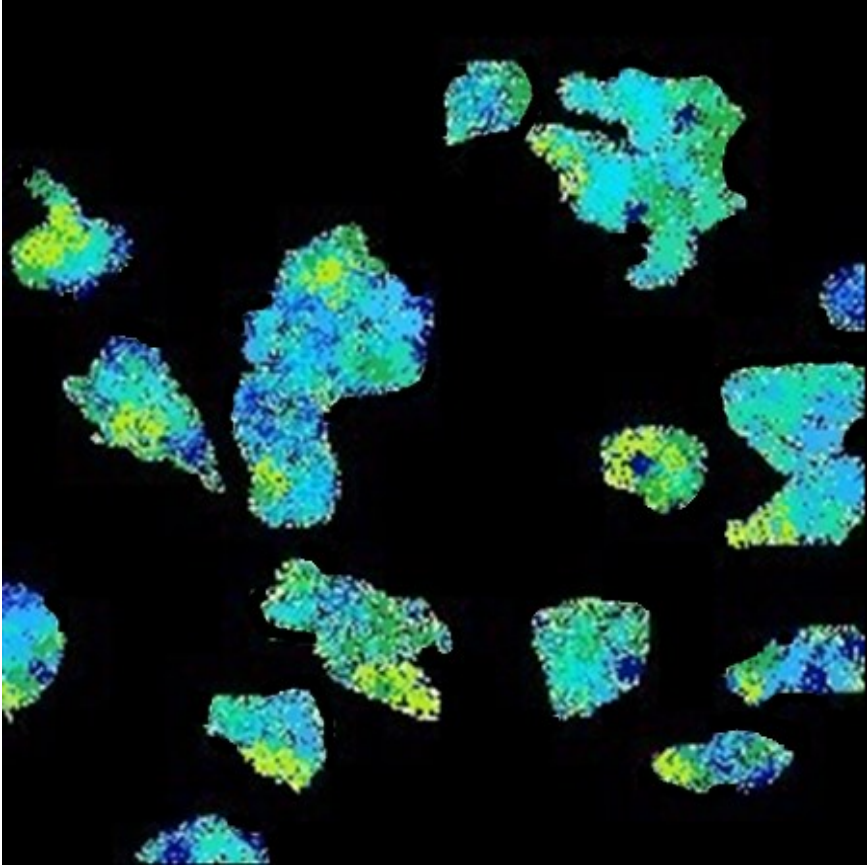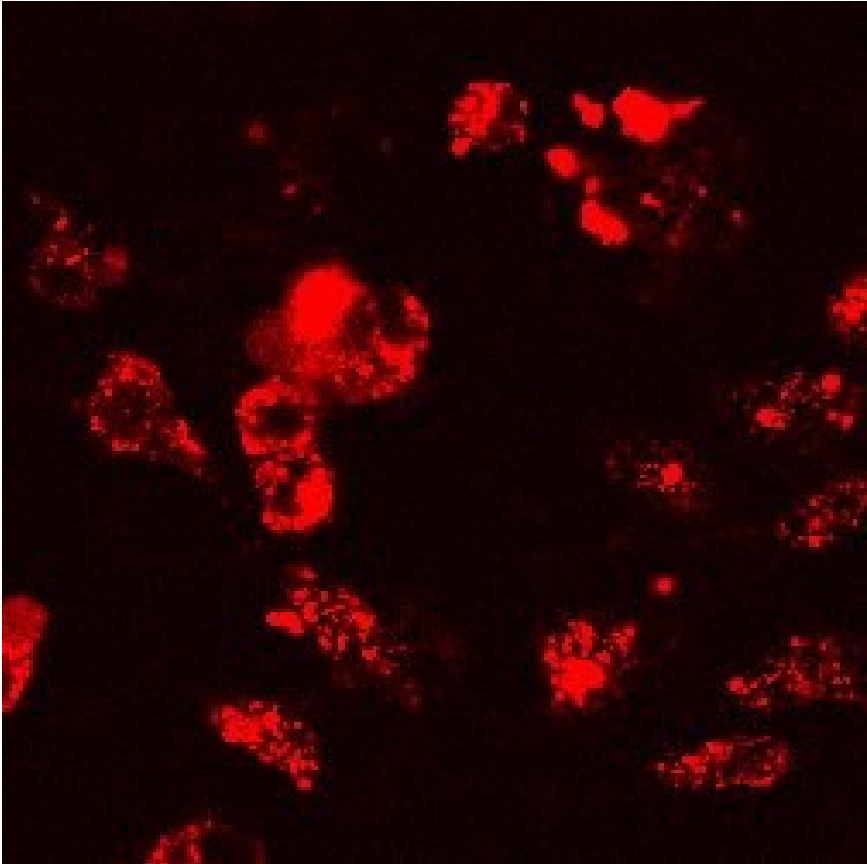

Supplement: d0cc05030j1.pdf [file d0cc05030j1.pdf]
